# Supplementary material for: Medial Prefrontal Cortical CB1Rs and Astrocytes Are Involved in Depression and the Antidepressant Effects of Running Exercise
Source: Research Square preprint supplement (doi:10.21203/rs.3.rs-6784542/v1), 2025-06-23
Supplement: Supplementary file 1 [file ad6c76817f5098bb0288a719.docx]

**supplementary materials**

**1. Animals**

In this study, male Sprague‒Dawley rats weighing between 180–230 g and aged 4–6 weeks were obtained from Beijing Weitonglihua Experimental Animal Technology Co., Ltd (Wuhan, China). The rats were housed in the Experimental Animal Center of Chongqing Medical University under controlled conditions with a temperature range of 20–24 °C and a 12-h light/dark cycle. During the acclimatization process, the animals were kept in a quiet environment and provided with sufficient food and water. All animal experiments should comply with the ARRIVE guidelines, and all experimental procedures were carried out in accordance with the U.K. Animals (Scientific Procedures) Act, 1986 and associated guidelines, EU Directive 2010/63/EU for animal experiments, or the National Research Council's Guide for the Care and Use of Laboratory Animals.

**2. Establishment of the CRS depression model**

A rat model of depression was established by subjecting the animals to chronic restraint stress (CRS) combined with solitary rearing. All the experimental rats were individually housed, except for those in the control group. The restraint device used was a 500 mL mineral water bottle with a tube length of approximately 21 cm and the inner diameter of the cylinder mouth measuring approximately 5 cm. The bottle mouth, located approximately 5 cm from the cylinder mouth, served as a vent. The back end of the mineral water bottle had two sleeves whose length could be controlled. The rats were secured within the cylinder with their heads oriented toward the bottle opening to ensure unobstructed respiration. The movement of the rats was regulated by adjusting the position of the plastic cylinder at its posterior end, which was affixed with tape to prevent harm to their bodies. Confinement occurred daily for a duration of 6 h (9:00–15:00), during which time food and water were withheld. After the confinement period ended, the rats were reintroduced to their cages for regular feeding. The chronic confinement stress protocol lasted for 21 days38-40.

**3. Treadmill running program**

In the running model groups, the animals ran on a horizontal motorized treadmill 5 days/week. The initial velocity was set to 10 m/min and was increased by 2 m/min per day beginning on the second day until it reached a constant value of 20 m/min for the remainder of the study41. The nonrunning groups were housed under normal conditions and were not subjected to running.

**4. mPFC stereotaxic injection surgery**

Each rat was placed in a prone position on the operating table, with its head immobilized and under continuous anesthesia using 4% isoflurane. A midline incision was made along the scalp, followed by wiping of the meninges with a 3% hydrogen peroxide solution. The center of the fontanel triangle served as the origin for determining rat mPFC azimuth coordinates (M/L: ±0.7 mm, A/P: +3.2 mm, D/V: -3.0 mm) to guide drilling. The adeno-associated virus (Hanbio, Shanghai, China) was injected slowly via microsyringes at a dose of 5 × 109 vg from the bilateral mPFC drilling sites. After injection, the needle was left for 5 min before it was gradually withdrawn. Once each side was injected, the scalp was sutured, and erythromycin ointment was applied to prevent infection. Following surgery, the anesthesia gas valve was closed, and the rat was transferred to a thermal blanket. Upon regaining consciousness, the rat was subsequently housed in a single cage for feeding purposes.

**5. Nucleotide sequences of adeno-associated viruses (AAVs) targeting CB1Rs**

The nucleotide sequences of the siRNAs and shRNAs targeting the CB1R-encoding gene for knockdown, as well as the sequence information of the CB1R-overexpression vector, are provided below:

Control empty adeno-associated virus vectors:

siRNA sequence:

5’- TTCTCCGAACGTGTCACGTAA -3’

shRNA sequence:

Forward strand:

5’- GATCCGTTCTCCGAACGTGTCACGTAATTCAAGAGATTACGTGACACGTTCGGAGAATTTTTTC -3’

Reverse strand:

5’- AATTGAAAAAATTCTCCGAACGTGTCACGTAATCTCTTGAATTACGTGACACGTTCGGAGAACG -3’

CB1R-knockdown adenoviruses:

siRNA sequence:

5’- CCAAATTAGGATACTTCCCACAGAA -3’

shRNA sequence:

Forward strand:

5’- AATTCGCCAAATTAGGATACTTCCCACAGAATTCAAGAGATTCTGTGGGAAGTATCCTAATTTGGTTTTTTG -3’

Reverse strand:

5’- GATCCAAAAAACCAAATTAGGATACTTCCCACAGAATCTCTTGAATTCTGTGGGAAGTATCCTAATTTGGCG -3’

CB1R overexpressed adeno-associate virus:

5’- ATGAAGTCGATCCTAGATGGCCTTGCAGACACCACCTTCCGTACCATCACCACAGACCTCCTCTACGTGGGCTCGAATGACATTCAGTATGAAGATATCAAAGGAGACATGGCATCCAAATTAGGATACTTCCCACAGAAATTCCCTCTAACTTCCTTCAGGGGTAGTCCCTTCCAAGAAAAGATGACCGCAGGAGACAACTCCCCGTTGGTCCCAGCAGGAGACACAACAAACATTACAGAGTTCTATAACAAGTCTCTCTCGTCGTTCAAGGAGAATGAGGAGAACATCCAGTGTGGGGAGAACTTTATGGACATGGAGTGCTTTATGATTCTGAATCCCAGCCAGCAGCTGGCCATCGCTGTACTGTCCCTCACACTGGGCACCTTCACGGTTCTGGAGAACCTACTGGTGCTGTGTGTCATCCTGCACTCCCGCAGTCTCCGATGCAGGCCTTCCTACCACTTCATCGGCAGCCTGGCAGTGGCCGACCTCCTGGGAAGTGTCATTTTTGTGTACAGCTTTGTTGACTTCCATGTATTCCACCGTAAAGACAGCCCCAATGTGTTTCTGTTCAAACTGGGTGGGGTTACAGCCTCCTTCACAGCTTCTGTGGGCAGCCTGTTCCTCACAGCCATCGACAGGTACATATCCATTCACAGGCCTCTGGCCTATAAGAGGATCGTCACCAGGCCCAAGGCCGTTGTGGCCTTTTGCCTGATGTGGACTATCGCAATAGTAATCGCTGTGTTGCCTCTCCTGGGCTGGAACTGCAAGAAGCTGCAATCTGTTTGCTCGGACATTTTCCCACTCATTGACGAGACCTACCTGATGTTCTGGATTGGGGTGACCAGTGTGCTGCTGCTGTTCATTGTGTACGCGTACATGTACATTCTCTGGAAGGCTCACAGCCATGCGGTCCGCATGATTCAGCGTGGGACCCAGAAGAGCATCATCATCCACACGTCAGAAGACGGCAAGGTGCAGGTGACCCGGCCTGACCAAGCCCGCATGGACATTAGGCTGGCCAAAACCCTGGTTCTGATCCTGGTGGTGTTGATCATCTGCTGGGGCCCTCTGCTTGCGATCATGGTGTATGACGTCTTCGGGAAGATGAACAAGCTTATCAAGACGGTGTTTGCCTTCTGCAGTATGCTCTGCCTGCTGAACTCCACCGTGAACCCCATCATCTATGCTCTGAGGAGCAAGGACCTGAGACATGCTTTCCGAAGCATGTTCCCTTCGTGCGAAGGCACCGCACAGCCTCTAGACAACAGCATGGGGGACTCAGACTGCCTGCACAAGCACGCCAACAACACAGCCAGCATGCACAGGGCCGCGGAGAGCTGCATCAAGAGCACCGTTAAGATCGCGAAGGTGACCATGTCTGTGTCCACAGACACGTCCGCCGAGGCTCTGTGA -3’

**6. Experimental design**

**Experiment I:**

The rats were randomly assigned to either the control group or the CRS group. The CRS depression model was induced by subjecting the rats to CRS intervention for a period of three weeks. The depression model rats were subsequently selected based on the results of their saccharin preference test and forced swimming test results and randomly divided into two groups: the CRS group and the CRS+RUN group. Rats in the CRS+RUN group underwent a running exercise intervention. Body mass monitoring and saccharin preference experiments were conducted weekly at fixed intervals, whereas forced swimming tests were conducted on the 13th week (control group n=12, CRS group n=9, CRS+RUN group n=9). Throughout this process, with the exception of during the behavioral tests, the rats in the control group were housed in group cages (5 rats/cage), whereas those in the other two groups were individually housed. The CRS intervention was consistently maintained in both experimental groups. Both the CRS group and the CRS+RUN group received continuous CRS intervention during the running exercise intervention.

**Experiment II:**

The rats were randomly divided into two groups: the control group and the CB1R-KD group. The rats in the latter group were regionally injected in the mPFC with CB1R-knockdown adeno-associated virus. After surgery, body weight monitoring and saccharin preference tests were performed on a fixed schedule for 6 weeks, whereas forced swimming tests were conducted at 9 weeks (control group n=19, CB1R-KD group n=20). During this period, except for during the behavioral assessments, the rats in the control group were regionally injected in the mPFCs with empty adeno-associated virus vectors, were fed ad libitum, and were housed with five animals per cage.

The rats were randomly divided into a control group and a CRS group. The CRS model rats underwent CRS intervention for three weeks. After the depression-related behavioral tests, the depression model rats were randomly assigned to either the CRS model group or the CRS model + mPFC regional CB1R overexpression group (CRS + CB1R-OE group), and the latter were regionally injected in the mPFC with CB1R overexpression-inducing adeno-associated virus. Body mass monitoring and saccharin preference experiments were conducted at a fixed time every week, whereas forced swimming experiments were conducted in the 13th week. (Control group n=28, CRS group n=11, CRS+ CB1R-OE group n=12). During this process, except for during the behavioral tests, the rats in the control group were fed normally and housed in group cages (5 rats/cage), whereas those in the other three groups were housed individually throughout. The control group and CRS group received a regional injection in the mPFC of empty adeno-associated virus vectors.

**Experiment III:**

The rats were randomly divided into two groups: the control group and the CB1R-KD group. The rats in the latter group were regionally injected in the mPFC with CB1R-knockdown-inducing adeno-associated virus. Six weeks after mPFC regional CB1R expression knockdown, the rats were randomly assigned to either the mPFC regional CB1R knockdown group (CB1R-KD group) or the mPFC regional CB1R knockdown + RUN group (CB1R-KD + RUN group), with the latter undergoing running intervention for 6 weeks. Body weight monitoring and saccharin preference tests were performed on a fixed schedule every week, whereas forced swimming tests were conducted at the 9th and 15th weeks (control group n=19, CB1R-KD group n=10, CB1R-KD+RUN group n=10). During this period, except for during the behavioral assessments, the rats in the control group were regionally injected in the mPFC with empty adeno-associated virus vectors, were fed ad libitum, and were housed with five animals per cage.

**7. Behavioral tests**

**7.1 Saccharin preference test**

Prior to the formal test, each of the animals underwent adaptation training with a saccharin solution. Each animal was provided with two bottles. One bottle contained regular water, and the other contained sweetened water with a 0.03% saccharin concentration. After 24 h, the consumption levels of each type of water by each animal was recorded, and the percentage preference for sweetened water was calculated as follows: (24-h consumption level of sweetened water/total consumption level of both types of water) × 100%. Each animal was housed individually during the test, and the surrounding environment remained constant.

**7.2 Forced swimming test**

The forced swimming test is a classic experimental paradigm for investigating the pathogenesis of depression and screening the effectiveness of antidepressant drugs, serving as an assessment tool to evaluate the psychological state of despair and depression in animals42. For the experimentation purposes, each rat was placed individually in a transparent cylinder measuring 40 cm in height and 20 cm in diameter and filled with water to a depth of 30 cm. The temperature of the water within the cylinder was maintained at a constant level of 23 ± 1 °C. Prior to the formal forced swimming experiment, adaptive swimming training was conducted for each rat for a period of 10 min. The formal forced swimming experiment commenced 24 h later, during which time each rat underwent testing for six min, and the last four min of inactivity were recorded. After each trial, it was necessary to replace the water in the transparent cylinder. Following experimentation, each animal's fur was dried with a towel and returned to its original cage. The swimming behavior of each rat was recorded via a video camera and subsequently analyzed and recorded via ANY-maze animal behavior analysis software for "immobility time" and "immobile episodes," which are defined as the action of giving up struggling or floating while making slight movements of the limbs to keep the head at the surface level.

**8. Preparation of rat brain tissue specimens**

Five rats were randomly selected from each of the experimental groups. Each rat was administered peritoneal anesthesia via 1% pentobarbital sodium (4 mL/kg body weight) and underwent tissue fixation via perfusion with 4% paraformaldehyde fixative. The entire brain tissue was extracted and divided into left and right hemispheres along a sagittal section of the brain. One hemisphere was chosen at random for dehydration in sucrose solution. After complete dehydration, continuous 50-μm frozen sections of brain tissue were prepared along the coronal plane of the cerebrum. In accordance with the stereological sampling method, an isometric 1/6 sampling of brain tissue sections was conducted with 15 sections per series on average. Finally, six consecutive isometric sections containing the mPFC structure were obtained and subsequently preserved in 75% ethanol at -20 °C.

**9. Immunohistochemistry and stereological analyses**

For immunohistochemical staining, one group of brain tissue sections obtained using the previous method was extracted from each rat. Each group of brain tissue sections was washed three times with 0.01 M PBS for 10 min and then four times with a solution containing 0.3% Triton X-100 and 0.1% Tween-20 in 0.01 M PBS (PBS+TT) for 15 min each. After incubation in a solution of 3% hydrogen peroxide for 20 min, the sections were washed three times with PBS + TT for 10 min each before being incubated in citrate solution for 30 min for thermal repair. The tissue sections were blocked in PBS+TT solution with 10% goat serum and incubated at 37 °C for two h. After the sections were blocked with serum, the sections were incubated with primary antibodies (rabbit anti-GFAP, ab7260, Abcam, UK, 1:2000) in PBS+TT mixture at 4 °C for 72 h. On the fourth day, the tissue sections were washed four times with PBS+TT for 15 min each. The sections were then incubated with secondary antibody (SP9001-B biotin-labeled sheep anti-rabbit IgG, 1:20) at 4 °C for 24 h. Afterward, the sections were again washed four times with PBS+TT for 15 min each before being incubated in a water bath at 37 °C for four h with a tri-antibody (SP-9001-C horseradish peroxidase-labeled streptavidin, 1:1). The tissue sections were subjected to four 15-min washes with 0.01 M PBS, followed by a 10-min incubation with diaminobenzidine (DAB) for color development. After rinsing with deionized water, the sections were mounted onto slides and counterstained with hematoxylin solution for five min to visualize the nuclei. Gradient dehydration was performed using 70%, 80%, and 90% ethanol for five min each, followed by incubation in anhydrous ethanol for two rounds of two min each and incubation in xylene clearing solution for three rounds of ten min each. The sections were then sealed with neutral gum, dried, and observed under a microscope.

Following immunohistochemical staining, the sections were analyzed via Stereo Investigator software (MBF Bioscience, USA). The mPFC boundaries were delineated on the basis of the rat brain atlas43,44 (see Figure 1a). The unbiased counting frame size was set to 60 μm× 60 μm with an area sampling fraction of 2%, a sampling height of 15 µm, and a protection height of 3 µm. The counting frame was randomly generated by software, and GFAP+ cells were counted under a 100x oil immersion objective. The inclusion/exclusion criteria for cell counting are shown in Figure 1b, c. The total number of GFAP+ cells in each rat mPFC was calculated accordingly. The formula for calculating the total number of GFAP+ cells in the mPFC of each animal is as follows: **N = ΣQ-/(ssf**×**asf**×**tsf)**, where **ΣQ-** represents the total number of GFAP+ cells directly counted in the sampled tissue, **ssf** represents the section sampling fraction, **asf** represents the area sampling fraction, and **tsf** represents the height sampling fraction, which is defined as the ratio of the counting frame height to the average section thickness.

**10. Immunofluorescence staining**

One group of brain tissue sections was taken from each of three rats randomly chosen from each experimental group. The sections were subjected to three 10-min rinses with 0.01 M PBS followed by four 15-min rinses with PBS+TT. Thermal repair with citrate solution was performed for 30 min before the samples were again washed with PBS+TT three times. All the sections were incubated in PBS+TT blocking buffer containing 10% goat serum at 37 °C for two h. After the samples were blocked with serum, they were incubated with primary antibodies (anti-CB1R, sc-518035, Santa Cruz, USA, 1:200; or anti-GLT-1, ab1783, Millipore, USA, 1:2000) at 4 °C for 72 h. The sections were washed with PBS+TT four times for fifteen minutes each and then incubated with a fluorescence-conjugated secondary antibody (Abbkine, USA) at 37 °C in the dark for two hours. DAPI staining solution was applied, and the samples were incubated in the dark for five minutes at room temperature.

**11. RT‒PCR**

Three rats were randomly selected from each of the groups and anesthetized via an intraperitoneal injection of 1% pentobarbital sodium at a dose of 4 mL/kg. Following anesthesia, the rats were euthanized, and the brain tissues were extracted. The mPFC tissues were then isolated from the brain on ice and placed in enzyme-free Eppendorf tubes (1.5 mL). mPFC tissues were pulverized in liquid nitrogen and transferred to a microcentrifuge tube containing 1.5 mL of TRIzol, in which they were left undisturbed for 5 min to ensure complete lysis of the tissue cells. The resulting tissue samples were then centrifuged at 4 °C and 12000 rpm for 5 min. After centrifugation, the supernatant was transferred to a new enzyme-free tube. Then, 300 μL of chloroform/isopropyl alcohol (24:1) was added, and the solution was thoroughly mixed before being centrifuged at 12000 rpm at 4 °C for 5 min. The resulting supernatant was then transferred to another enzyme-free Eppendorf tube with isopropyl alcohol added in equal volume and centrifuged again at 12000 rpm at 4 °C for 20 min. Finally, the supernatant was discarded, and the RNA particles were washed with 75% ethanol, dried for five min, and dissolved in DEPC water (60 μL). The concentration and purity of the RNA samples were assessed via a spectrophotometer, with all the samples exhibiting a 260:280 absorbance ratio of between 1.9 and 2.1. Reverse transcription was performed on the extracted RNA to obtain cDNA, followed by PCR amplification via a SYBR Green qPCR Master Mix Kit (B21202, Bimake, Houston, USA) according to the manufacturer's instructions, utilizing a system consisting of a cDNA template (1 μL), a target gene primer (1 μL), SYBR dye (5 μL), and nuclease-free water (3 μL) (refer to Table 1 for primer serial numbers). A real-time PCR detection system (Bio-Rad Technology, China) was utilized for detection, with the following reaction conditions: (1) 95 °C for 5 min and (2) 39 cycles of 95 °C for 30 s and 60 °C for another 30 s. Table 1 lists the related gene sequences of primers used for real-time quantitative PCR. Data analysis was conducted via the 2-ΔΔCT method 45.

**12. Western blotting**

The mPFC tissues were treated with 100 μL RIPA lysis buffer containing phosphatase inhibitor and protease inhibitor (RIPA lysis buffer:phosphatase inhibitor:protease inhibitor = 100:1:1). The tissue samples were homogenized via ultrasonication and then centrifuged at 4 °C at 12000 rpm for 10 min to collect the supernatant. The protein concentration of each sample was determined via the BCA quantitative method, and the liquid volume of each protein was adjusted on the basis of the sample with the lowest concentration. An appropriate amount of protein loading buffer was subsequently added to each sample, thoroughly mixed, and incubated in a metal bath at 99 °C for 10 min for denaturation. Finally, the protein samples were allowed to cool naturally at room temperature. A 10% PAGE gel was prepared, and protein samples were sequentially added on the basis of a uniform protein concentration. Electrophoresis was conducted at a constant voltage of 50 V for 30 min, followed by electrophoresis at a constant voltage of 110 V for 70 min. After electrophoresis, the transfer time was determined according to the molecular weight of the target protein, and a constant current of 210 mA was applied during transfer. The membrane was subsequently immersed in TBST solution containing 5% skim milk and blocked at room temperature for one h before being rinsed with TBST for five min. Primary antibodies, including anti-CB1R (sc-518035, Santa Cruz, USA, 1:200), anti-GLAST (ab181036, Abcam, UK, 1:2000), anti-GLT-1 (sc-365634, Santa Cruz,USA,1:1000), and anti-β-actin (BM38731, Boster, China, 1:2000), were then incubated with the membranes overnight at 4 °C. The membrane was subsequently rinsed three times with TBST for ten min each before being incubated with secondary antibodies (diluted to a ratio of 1:5000) at room temperature for two h. Following another three rounds of rinsing with TBST for ten min each, enhanced chemiluminescence (ECL) imaging was performed. Semiquantitative analysis of target protein gray values was performed via ImageJ image analysis software (NIH, Bethesda, MD, USA).

**13. Statistical analyses**

All the data were statistically analyzed via SPSS 26.0 software and are presented as the means ± standard deviations (M ± SD). The normality of the data was assessed via the Shapiro‒Wilk test. If the data were normally distributed, an independent sample t test was used for comparisons between two groups, one-way analysis of variance (ANOVA) was used for comparisons among three or more groups, and post hoc tests were conducted via the least significant difference (LSD). If the data did not conform to a normal distribution, logarithmic transformation was used to convert the nonnormally distributed data into normally distributed data. If the transformed data still did not conform to a normal distribution, nonparametric tests were conducted. A p value of less than 0.05 indicates statistical significance.
